# Supplementary material for: Long-Term Use and Application of Systematic Tailored Assessment for Responding to Suicidality (STARS) Protocol Following Original Training
Source: MDPI journal article supplement (doi:10.3390/ijerph191811324), 2022-09-08
Supplement: s1 [file s1]

Electronic Supplementary Material (ESM):

**Table S1.** Spearman Rho correlations between demographic and professional characteristics and use and perceptions of the STARS-p.

|                                                                                                                    | All STARS | Part A | Part B | Part C  | Safety plan | Clin Notes |
|--------------------------------------------------------------------------------------------------------------------|-----------|--------|--------|---------|-------------|------------|
| Gender (Male vs female)                                                                                            | -.317**   | -.264* | -.306* | -.360** | -.128       | -.327**    |
| Age                                                                                                                | .074      | .028   | .249*  | .004    | .081        | .256*      |
| *Role (MHP-wQ vs MHP-woQ)                                                                                          | .233      | -.161  | -.156  | .012    | -.114       | .050       |
| Education (undergrad or less vs postgrad)                                                                          | -.261*    | -.023  | -.006  | -.138   | -.075       | -.040      |
| Years of experience in the role that pertains to suicide prevention work                                           | .091      | .191   | .104   | .074    | .196        | .259*      |
| FORMAL training in suicide prevention/management SINCE STARS training                                              | .215      | .109   | .129   | .151    | .020        | .260*      |
| Frequency of INFORMAL training                                                                                     | -.180     | -.111  | .040   | -.095   | -.023       | .011       |
| Frequency of contact with suicidal persons as part of their role                                                   | .125      | .033   | -.075  | .063    | .083        | .056       |
| Loss of client by suicide                                                                                          | .080      | -.112  | -.191  | .036    | -.113       | .063       |
| Suicide attempt of client                                                                                          | .054      | .274*  | -.007  | .209    | .146        | .120       |
| Perception of ease of administration of the STARS-p                                                                | .573***   | .275*  | .320** | .308*   | .552***     | .497***    |
| Perception of client feeling validated                                                                             | .409***   | .257*  | .318** | .397*** | .343**      | .325**     |
| Overall confidence in the usefulness of data                                                                       | .422***   | .259*  | .222   | .421*** | .289*       | .285*      |
| Confidence in the use of STARS-p for informing needs-based priority areas or interventions to mitigate suicidality | .588***   | .355** | .381** | .489*** | .462***     | .539***    |
| Perception of STARS as a client-centred approach to determination of client's current suicidality                  | .517***   | .178   | .177   | .342**  | .537***     | .366**     |

Note: N= 64-67; \* $p \leq .05$ , \*\* $p \leq .01$ , \*\*\* $p \leq .001$ .

# MHP-wQ = mental health practitioner with formal MH qualification; MHP-woQ = mental health practitioner without formal MH qualification (e.g., trained peer or support workers).
